# Supplementary material for: Assessment Strategies to Evaluate the Mediterranean Lifestyle: A Systematic Review
Source: MDPI journal article supplement (doi:10.3390/nu14194179), 2022-10-08
Supplement: s1 [file s1]

*Table S1. Methodological quality assessment of the cross-sectional studies included in the review.*

| Autores                                   | Ítem<br>1 | Ítem<br>2 | Ítem<br>3 | Ítem<br>4 | Ítem<br>5 | Ítem<br>6 | Ítem<br>7 | Ítem<br>8 |
|-------------------------------------------|-----------|-----------|-----------|-----------|-----------|-----------|-----------|-----------|
| Anastasiou et al. <sup>(17)</sup>         | +         | +         | +         | +         | +         | +         | +         | +         |
| Baldini et al. <sup>(31)</sup>            | +         | +         | +         | +         | -         | NA        | +         | -         |
| Bonaccio et al. <sup>(36)</sup>           | ?         | +         | +         | +         | +         | +         | +         | +         |
| Bowden et al. <sup>(18)</sup>             | +         | +         | +         | +         | +         | +         | +         | +         |
| Georgousopoulou<br>et al. <sup>(33)</sup> | +         | +         | +         | +         | ?         | -         | +         | +         |
| Katsagoni et al. <sup>(27)</sup>          | +         | +         | +         | +         | +         | +         | +         | +         |
| Lan et al. <sup>(28)</sup>                | +         | +         | +         | +         | -         | +         | +         | +         |
| Pavicic-Žeželj et al.<br><sup>(38)</sup>  | +         | +         | +         | +         | -         | -         | +         | +         |
| Sotos-Prieto et al. <sup>(5)</sup>        | -         | -         | +         | +         | -         | -         | +         | +         |

*Table S2. Methodological quality assessment of the randomized controlled trials included in the review*

| Autores                               | Ítem 1 | Ítem 2 | Ítem 3 | Ítem 4 | Ítem 5 | Ítem 6 | Ítem 7 | Ítem 8 | Ítem 9 | Ítem 10 | Ítem 11 | Ítem 12 | Ítem 13 |
|---------------------------------------|--------|--------|--------|--------|--------|--------|--------|--------|--------|---------|---------|---------|---------|
| Bouzas<br>et al. <sup>(19)</sup>      | +      | -      | +      | -      | -      | ?      | +      | +      | +      | +       | +       | +       | +       |
| Georgoulis<br>et al. <sup>(20)</sup>  | +      | +      | +      | +      | +      | ?      | +      | +      | +      | +       | +       | +       | +       |
| Georgoulis<br>et al. <sup>(21)</sup>  | +      | +      | +      | +      | +      | -      | +      | +      | +      | +       | +       | +       | +       |
| Georgoulis<br>et al. <sup>(22)</sup>  | +      | +      | -      | +      | +      | +      | +      | +      | +      | +       | +       | +       | +       |
| Hershey et<br>al. <sup>(28)</sup>     | +      | ?      | -      | ?      | ?      | ?      | ?      | -      | +      | +       | +       | +       | ?       |
| Katsagoni<br>et al. <sup>(29)</sup>   | +      | +      | +      | +      | +      | +      | +      | +      | +      | +       | +       | +       | +       |
| Pérez-Ferre<br>et al. <sup>(23)</sup> | +      | +      | +      | ?      | ?      | ?      | +      | +      | +      | +       | +       | +       | ?       |

|                                 |   |   |   |   |   |   |   |   |   |   |   |   |   |
|---------------------------------|---|---|---|---|---|---|---|---|---|---|---|---|---|
| Sotos-<br>Prieto et al.<br>(39) | + | ? | ? | ? | ? | ? | ? | + | + | + | + | + | + |
| Toobert<br>et al. (24)          | + | ? | + | ? | ? | ? | + | + | + | + | ? | + | + |
| Toobert<br>et al. (25)          | + | - | + | - | - | - | + | + | + | + | + | + | + |

[illegible][illegible]
